# Supplementary material for: The FDA-approved drug cobicistat synergizes with remdesivir to inhibit SARS-CoV-2 replication
Source: bioRxiv or medRxiv preprint supplement (doi:10.1101/2021.03.09.434219), 2021-03-09

**A**

SARS-CoV-2 infected

uninfected  
 untreated  
 Cobic 0.6  $\mu$ M  
 Cobic 1.2  $\mu$ M  
 Cobic 2.5  $\mu$ M  
 Cobic 5  $\mu$ M  
 Cobic 10  $\mu$ M  
 Remd 0.6  $\mu$ M  
 Remd 2.5  $\mu$ M  
 GC376 0.6  $\mu$ M  
 GC376 10  $\mu$ M

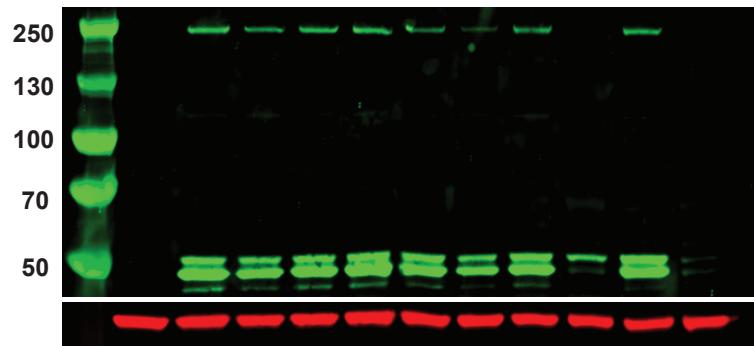human serum  
(SARS-CoV-2 patients)

anti-actin

mw: KDa

**B**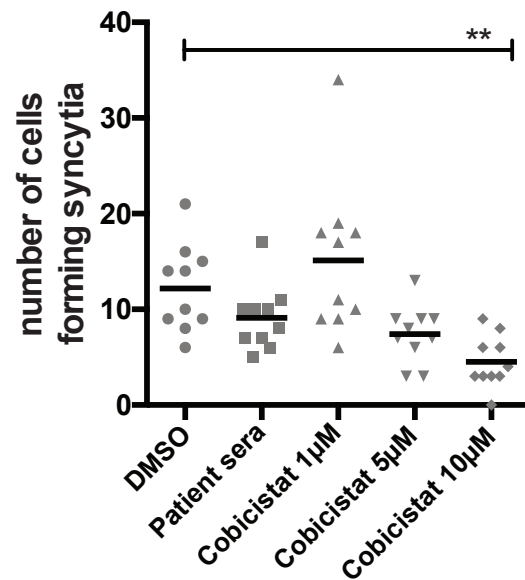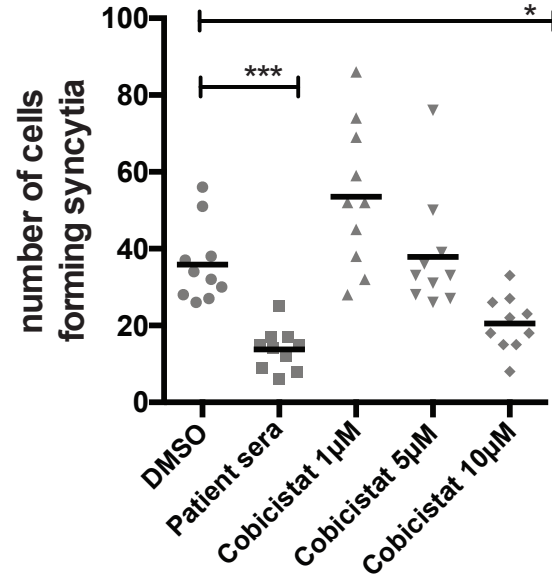

Supplement: Supplementary file [file media-3.pdf]
