# Supplementary material for: The FDA-approved drug cobicistat synergizes with remdesivir to inhibit SARS-CoV-2 replication
Source: bioRxiv or medRxiv preprint supplement (doi:10.1101/2021.03.09.434219), 2021-03-09

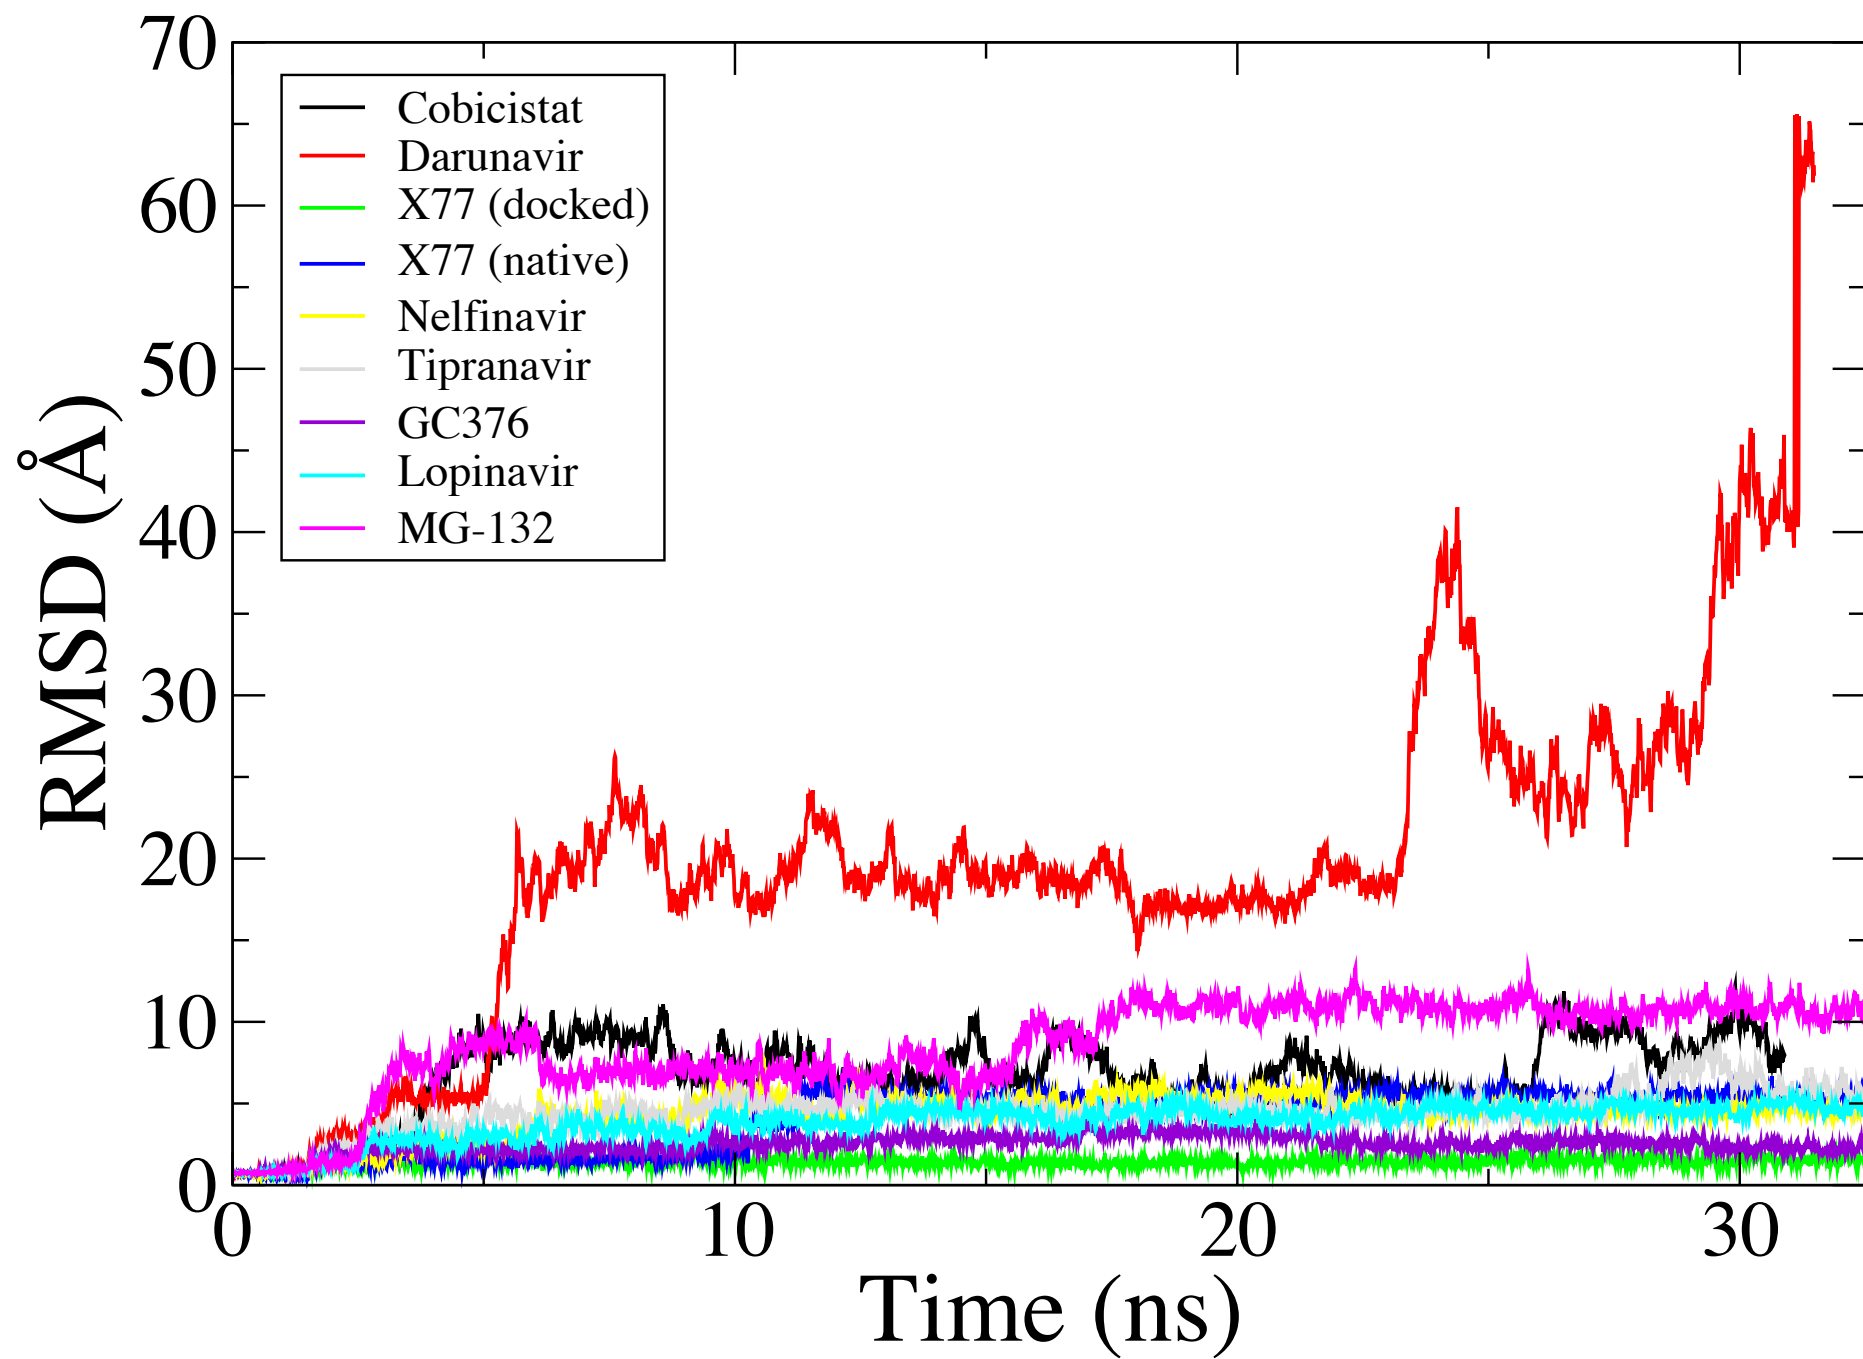

Supplement: Supplementary file [file media-4.pdf]
