# Supplementary material for: The FDA-approved drug cobicistat synergizes with remdesivir to inhibit SARS-CoV-2 replication
Source: bioRxiv or medRxiv preprint supplement (doi:10.1101/2021.03.09.434219), 2021-03-09
Supplement: Supplementary file [file media-5.pdf]

**A**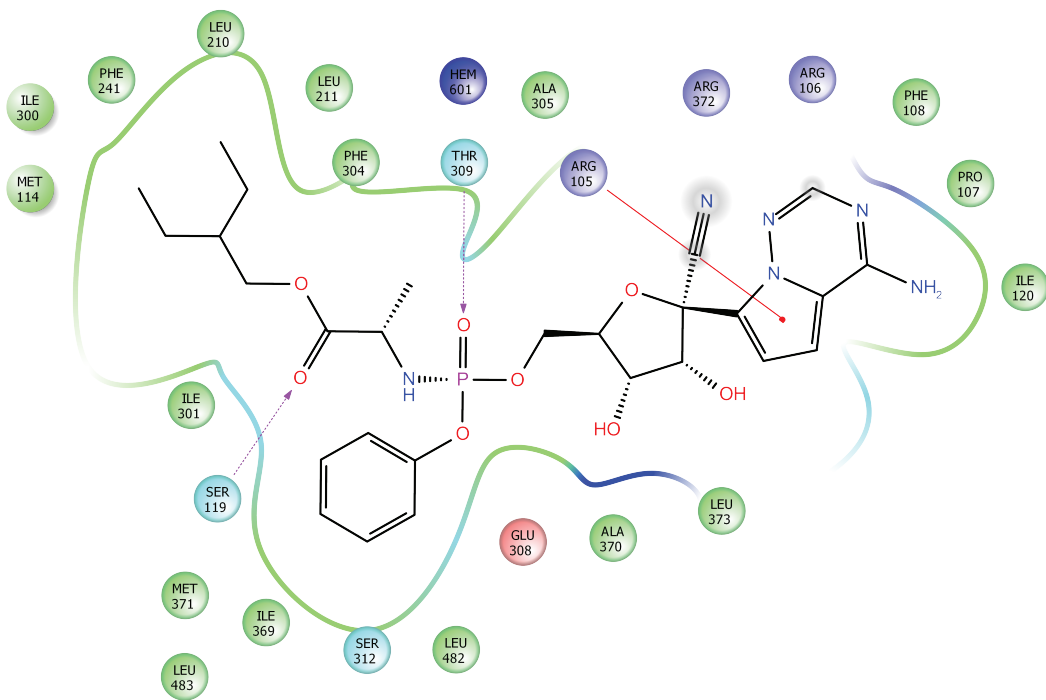**CYP3A4****docking score**

remdesivir: -10.8

cobicistat: -10.3

ritonavir: -8.9

**B**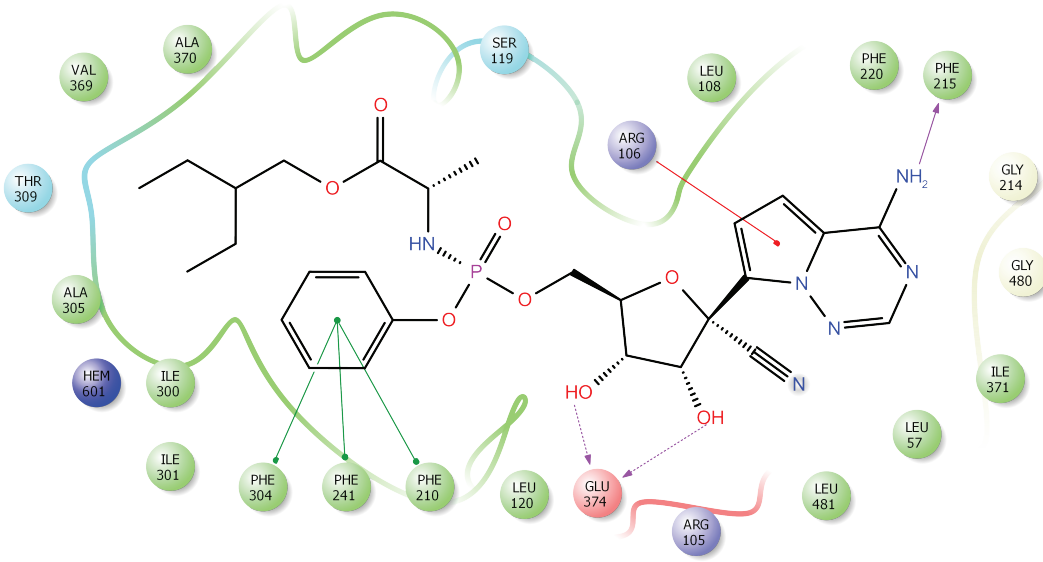**CYP3A5****docking score**

remdesivir: -9.1

cobicistat: -12.2

ritonavir: -11.0

**C**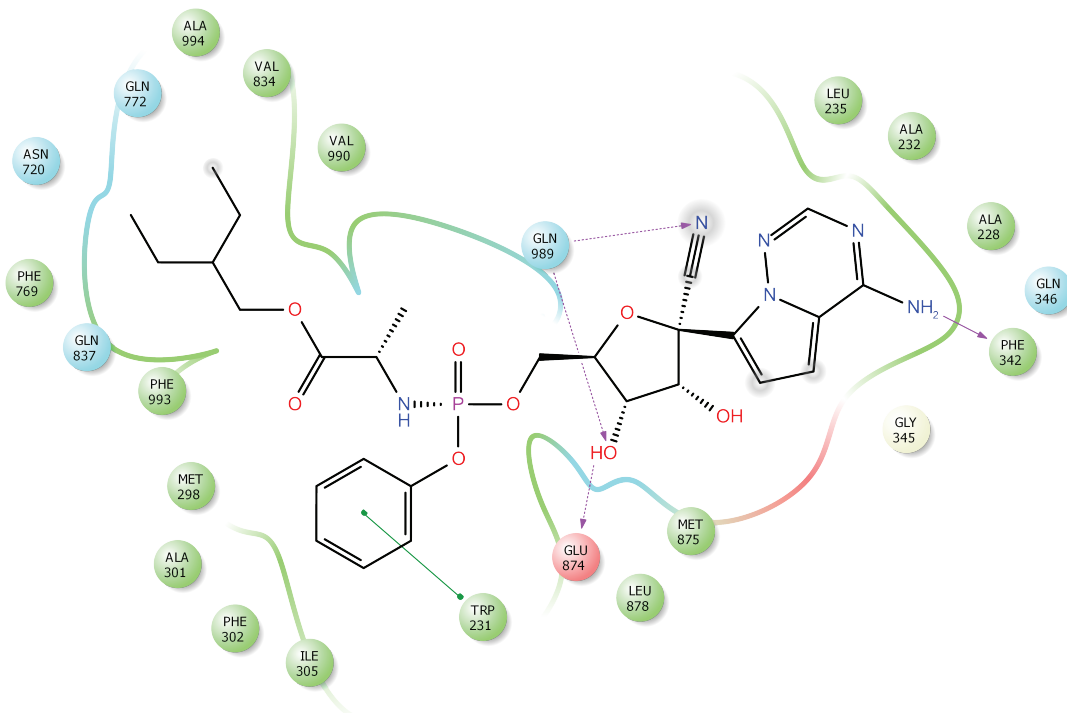**P-gp****docking score**

remdesivir: -9.8

cobicistat: -11.4

ritonavir: -8.9
