# Supplementary material for: The FDA-approved drug cobicistat synergizes with remdesivir to inhibit SARS-CoV-2 replication
Source: bioRxiv or medRxiv preprint supplement (doi:10.1101/2021.03.09.434219), 2021-03-09

**A**

**Dataset:** 36 anatomical parts from data selection: HS\_AFFY\_U133PLUS\_2-1  
 Showing 3 measure(s) of 3 gene(s) on selection: HS-0

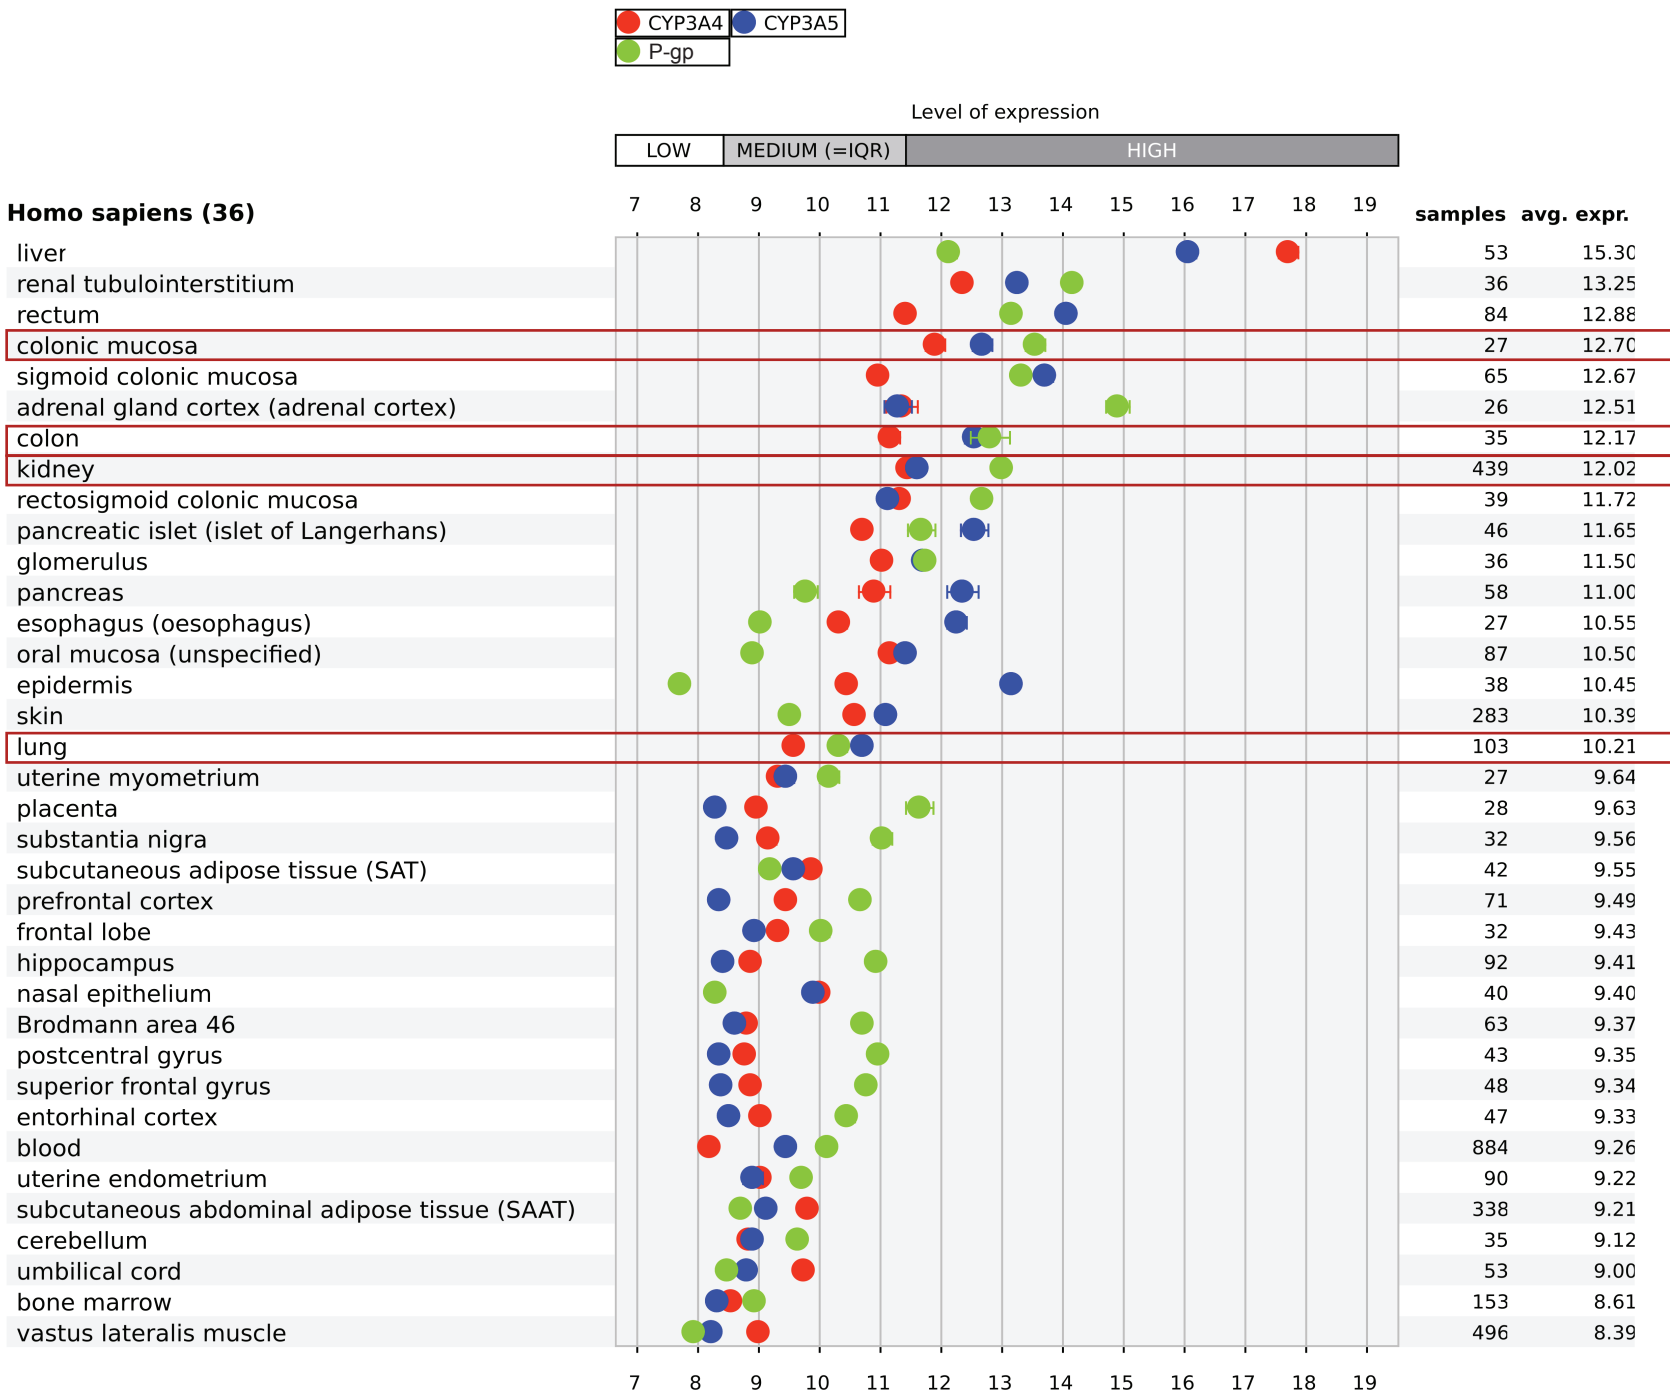

**B**

**Dataset:** 9 cell lines from data selection: HS\_mRNASeq\_HUMAN\_GL-1  
 Showing 3 measure(s) of 3 gene(s) on selection: HS-0

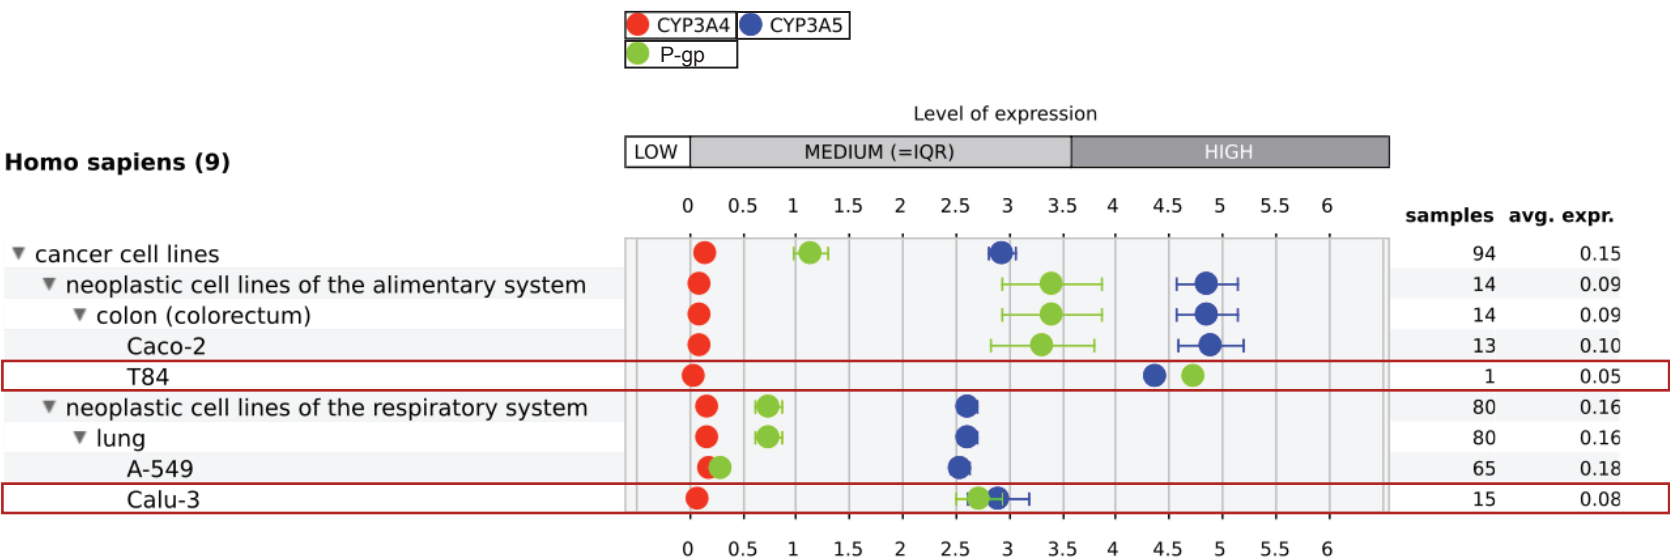

Supplement: Supplementary file [file media-6.pdf]
