# Supplementary material for: The FDA-approved drug cobicistat synergizes with remdesivir to inhibit SARS-CoV-2 replication
Source: bioRxiv or medRxiv preprint supplement (doi:10.1101/2021.03.09.434219), 2021-03-09
Supplement: Supplementary file [file media-9.pdf]

| DRUGBANK_ID    | Drug groups               | Generic name            | Main indication                                                               | Docking score |
|----------------|---------------------------|-------------------------|-------------------------------------------------------------------------------|---------------|
| DB01362        | approved                  | Iohexol                 | Contrast agent                                                                | -11.72        |
| DB09134        | approved                  | Ioversol                | Contrast agent                                                                | -11.03        |
| DB12407        | approved; investigational | Iobitridol              | Contrast agent                                                                | -10.22        |
| DB12615        | approved; investigational | Plazomicin              | Antibiotic for urinary tract infections                                       | -9.43         |
| DB00932        | approved; investigational | Tipranavir              | HIV protease inhibitor                                                        | -8.06         |
| DB00220        | approved                  | Nelfinavir              | HIV protease inhibitor                                                        | -7.91         |
| DB08909        | approved                  | Glycerol phenylbutyrate | Nitrogen-binding agent for management of urea cycle disorders                 | -7.86         |
| DB00905        | approved; investigational | Bimatoprost             | Analog of prostaglandin F2 $\alpha$ for treatment of glaucoma                 | -7.67         |
| DB08889        | approved; investigational | Carfilzomib             | Proteasome Inhibitor (anti-cancer)                                            | -7.54         |
| <b>DB09065</b> | <b>approved</b>           | <b>Cobicistat</b>       | <b>CYP3A inhibitor for boosting HIV-1 protease inhibitors</b>                 | <b>-7.12</b>  |
| DB04868        | approved; investigational | Nilotinib               | Tyrosine kinase inhibitor for treatment of chronic myelogenous leukemia       | -7.05         |
| DB01288        | approved; investigational | Fenoterol               | Beta adrenergic agonist for asthma treatment                                  | -7.05         |
| DB00482        | approved; investigational | Celecoxib               | Nonsteroidal anti-inflammatory drug                                           | -6.80         |
| DB13931        | approved                  | Netarsudil              | Rho kinase inhibitor for treatment of glaucoma                                | -6.75         |
| DB11611        | approved                  | Lifitegrast             | Anti-Inflammatory for treatment of keratoconjunctivitis sicca                 | -6.45         |
| DB11979        | approved; investigational | Elagolix                | gonadotropin-releasing hormone antagonist for treatment of endometriosis pain | -5.72         |
| DB01116        | approved; investigational | Trimethaphan            | nicotinic antagonist used to counteract hypertension                          | -5.70         |
