# Supplementary material for: The FDA-approved drug cobicistat synergizes with remdesivir to inhibit SARS-CoV-2 replication
Source: bioRxiv or medRxiv preprint supplement (doi:10.1101/2021.03.09.434219), 2021-03-09
Supplement: Supplementary file [file media-10.pdf]

### List of qPCR primers used in the study

| name                        | sequence                        | source                                                                                                                                                                    |
|-----------------------------|---------------------------------|---------------------------------------------------------------------------------------------------------------------------------------------------------------------------|
| <b>2019-nCoV_N1-Forward</b> | GAC CCC AAA ATC AGC GAA AT      | <a href="https://www.cdc.gov/coronavirus/2019-ncov/lab/rt-pcr-panel-primer-probes.html">https://www.cdc.gov/coronavirus/2019-ncov/lab/rt-pcr-panel-primer-probes.html</a> |
| <b>2019-nCoV_N1-Reverse</b> | TCT GGT TAC TGC CAG TTG AAT CTG |                                                                                                                                                                           |
| <b>2019-nCoV_N2-Forward</b> | TTA CAA ACA TTG GCC GCA AA      | <a href="https://www.cdc.gov/coronavirus/2019-ncov/lab/rt-pcr-panel-primer-probes.html">https://www.cdc.gov/coronavirus/2019-ncov/lab/rt-pcr-panel-primer-probes.html</a> |
| <b>2019-nCoV_N2-Reverse</b> | GCG CGA CAT TCC GAA GAA         |                                                                                                                                                                           |
| <b>Hum Cyp3A4-Forward</b>   | TGA TGG CTC TCA TCC CAG AC      |                                                                                                                                                                           |
| <b>Cyp3A4-Reverse</b>       | AGC CCC ACA CTT TTC CAT AC      |                                                                                                                                                                           |
| <b>AGM Cyp3A4-Forward</b>   | TGA TGG ACC TCA TCC CAG AC      |                                                                                                                                                                           |
| <b>Hum Cyp3A5-Forward</b>   | CGA CAA ACA AAA GCA CCG AC      |                                                                                                                                                                           |
| <b>Hum Cyp3A5-Reverse</b>   | TTA TTG ACT GGG CTG CGA G       |                                                                                                                                                                           |
| <b>AGM Cyp3A5-Forward</b>   | CGA CAA ACA AAA GCA CCG AG      |                                                                                                                                                                           |
| <b>AGM Cyp3A5-Reverse</b>   | TAA TTG ATT GGG CCA CGA G       |                                                                                                                                                                           |
| <b>P-gp (MDR1)-F</b>        | CCC ATC ATT GCA ATA GCA GG      |                                                                                                                                                                           |
| <b>P-gp (MDR1)-R</b>        | TGT TCA AAC TTC TGC TCC TGA     | Gao et al. Int J Clin Exp Pathol 2015                                                                                                                                     |
| <b>TBP-F</b>                | CCA CTC ACA GAC TCT CAC AAC     | Stanifer et al. Cell Reports 2020                                                                                                                                         |
| <b>TBP-R</b>                | CTG CGG TAC AAT CCC AGA ACT     |                                                                                                                                                                           |

Hum = human

AGM = african green monkey (Vero E6 cells)
