# Supplementary material for: The FDA-approved drug cobicistat synergizes with remdesivir to inhibit SARS-CoV-2 replication
Source: bioRxiv or medRxiv preprint supplement (doi:10.1101/2021.03.09.434219), 2021-03-09
Supplement: Supplementary file [file media-11.pdf]

| Ligand       | $\Delta G$ solvation | $\Delta E$ interactions | -TAS | $\Delta G$ total | FRET-determined EC50 (3CLpro) |
|--------------|----------------------|-------------------------|------|------------------|-------------------------------|
| GC376        | 35.9                 | -69.3                   | 18.2 | -15.2            | 0.11 $\mu$ M                  |
| X77 (docked) | 51.1                 | -88.9                   | 25.6 | -12.2            | N.A.                          |
| X77 (native) | 34.4                 | -62.8                   | 17   | -11.4            | N.A.                          |
| Tipranavir   | 28.8                 | -54.4                   | 19.5 | -6               | 47 $\mu$ M                    |
| Lopinavir    | 28.3                 | -61.9                   | 28.6 | -5               | 219 $\mu$ M                   |
| MG-132       | 19.1                 | -41.6                   | 18   | -4.5             | 18 $\mu$ M                    |
| Darunavir    | 10.9                 | -17.8                   | 17.1 | 10.3             | could not be calculated       |
| Cobicistat   | 82.9                 | -112.8                  | 44   | 14.2             | could not be calculated       |
| Nelfinavir   | 112.7                | -152.4                  | 81.3 | 41.6             | could not be calculated       |
